# Supplementary material
Source: Springer Nature journal article supplement (https://www.springermedizin.de/resource/supplementary/12916_2011_436_MOESM12_ESM.pdf/9599950)

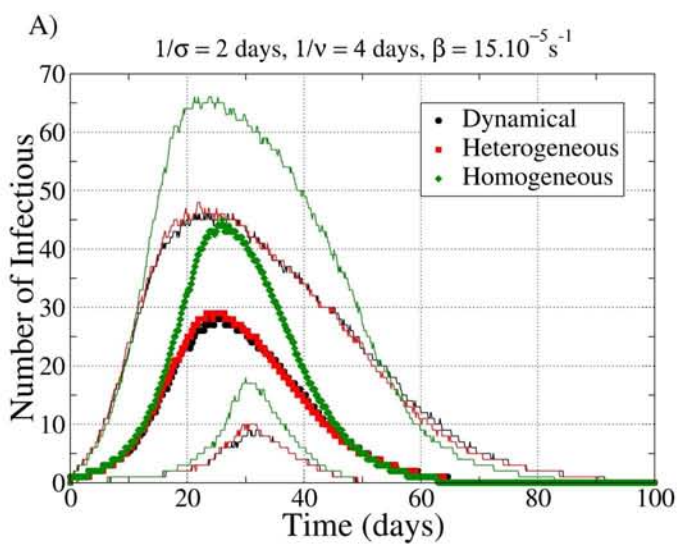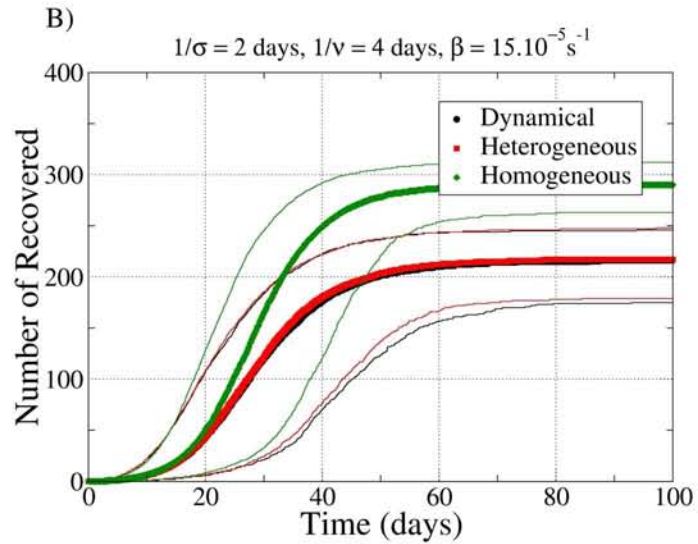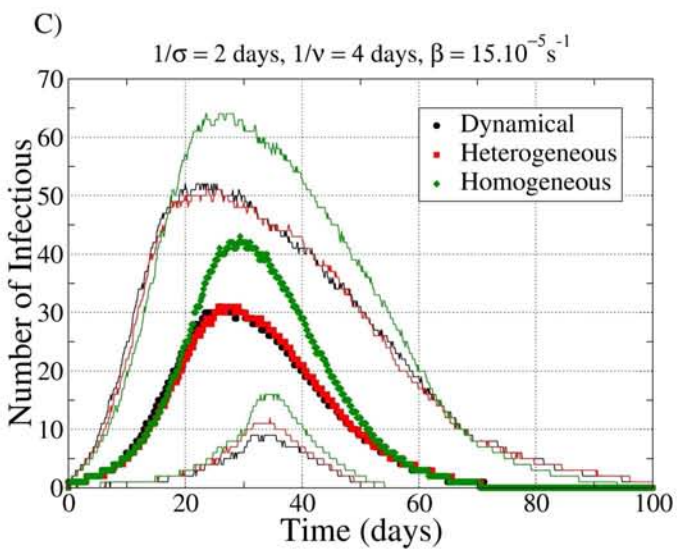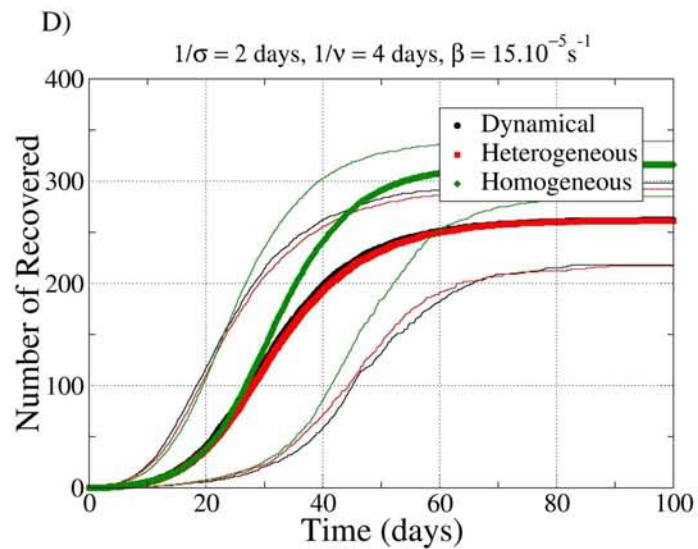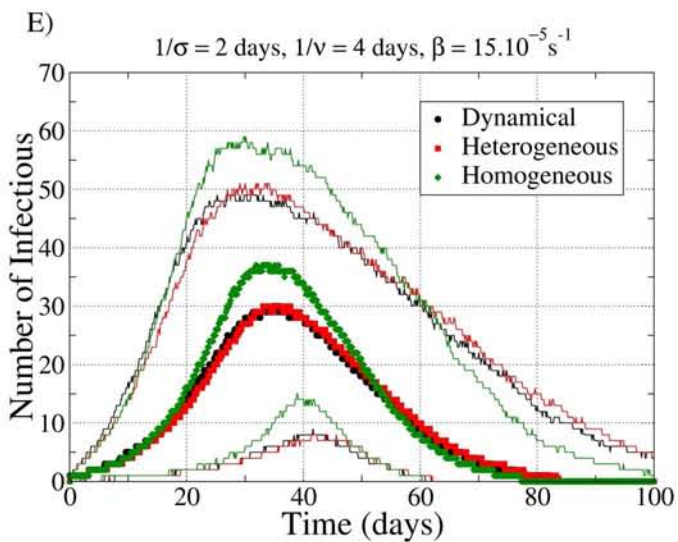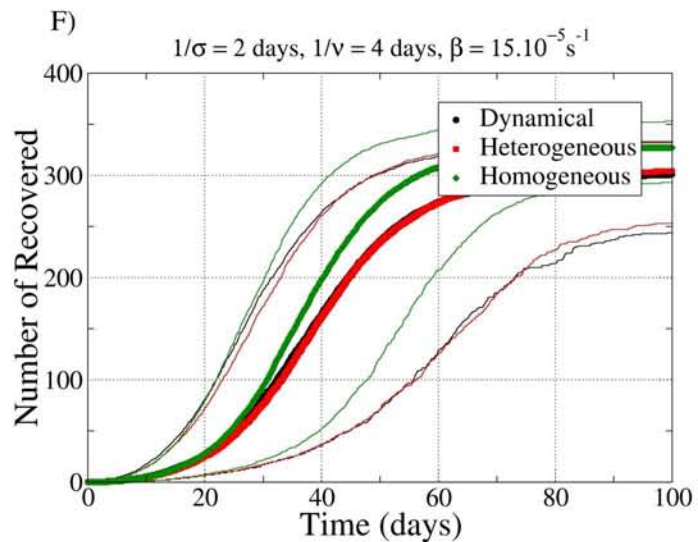

Supplement: MOESM12 [file 9599950]
